# Supplementary material
Source: PubMed Central journal article supplement (PMC2265384)
Supplement: NIHMS37593-supplement-01.pdf [file NIHMS37593-supplement-01.pdf]

Supplemental Data

UmuD and RecA Directly Modulate the Mutagenic Potential of the Y Family DNA Polymerase DinB

Veronica G. Godoy, Daniel F. Jarosz, Sharotka M. Simon, Alexej Abyzov, Valentin Ilyin, and Graham C. Walker

Supplemental Figure 1

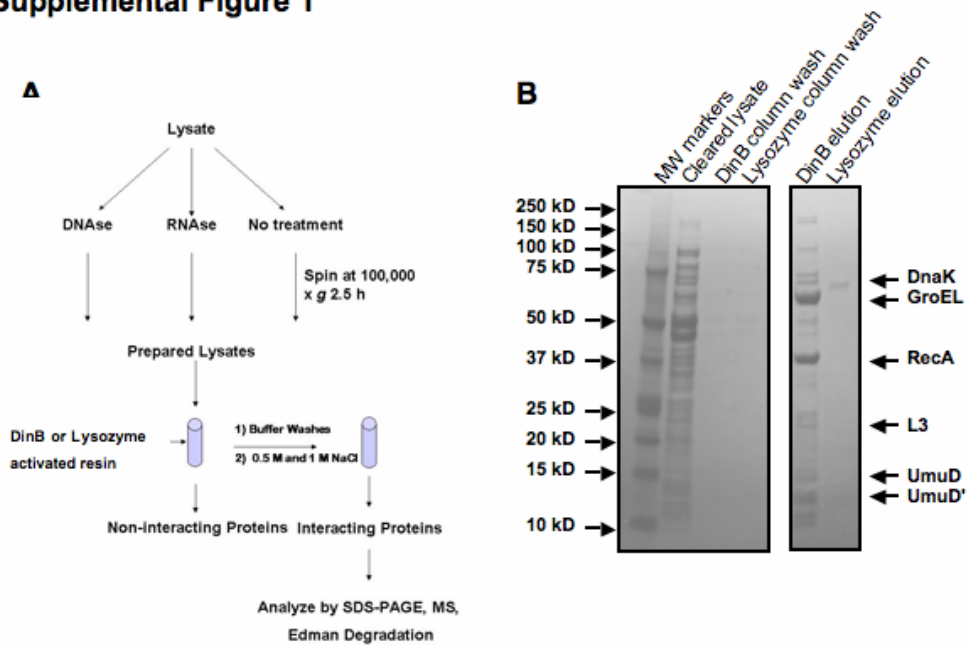

Figure S1. Schematic of the Affinity Chromatography Procedure Followed to Isolate Factors that Bind DinB

(A) DinB affinity resin was generated by coupling 3 mL of Affigel-10 N-hydroxysuccinimide derivatized agarose beads (Bio-RAD) with 30 mg of recombinant DinB (5 mg/mL) at 4°C. The

efficiency of coupling was monitored by determination of the protein concentration remaining in solution, and quantitative conversion was observed after *ca.* 4 h. The resin was blocked with excess 1 M Tris(hydroxymethyl) aminomethane pH 7.8 for 1 h at 4°C and loaded into three 1 mL columns. A control resin was similarly generated using 30 mg hen egg white lysozyme (Sigma) due to its elevated isoelectric point (pI 11.0) and was treated identically with respect to subsequent experimental steps. The DinB affinity columns and lysozyme controls were equilibrated in 50 mM Hepes pH 7.5, 100 mM KCl, 5% glycerol, 1 mM DTT (wash buffer). One liter of *lexA(Def) E. coli* cells were grown to fresh saturation in Luria Burtani (LB) broth, harvested by centrifugation, and resuspended in 50 mL wash buffer containing 15 mM MgCl<sub>2</sub>. A lysate was generated with two passes through a French pressure cell at 14,000 psi, and cleared of ribosomes by ultracentrifugation at 100,000 x g for 4 h prior to separation into three equal aliquots. One of these was left untreated and the other two were digested with either DNase I (1000 units; Sigma) or RNase A (100 units; Sigma) for 1 h at 4°C. Each aliquot was divided in half and applied to both a DinB affinity column (1 mL) and a lysozyme control column (1 mL) at 4°C. Each column was washed with 50 mL of wash buffer and proteins remaining on the resin were identified by removing 100 µL of each resin and boiling with 100 µL SDS-PAGE loading buffer.

**(B)** The eluates were separated by 4-20% SDS-PAGE and DinB-interacting proteins were identified by Edman degradation.

## Supplemental Figure 2

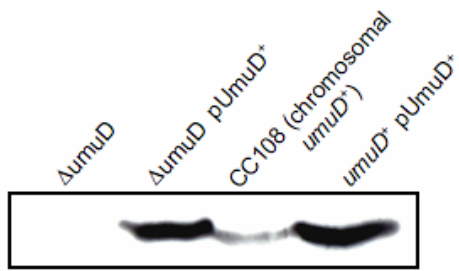

### Figure S2. Relative Levels of UmuD Expressed from the Plasmids Employed in This Study

Immunoblot was performed using an antibody against UmuD. Whole cell pellets were obtained from 0.5 mL freshly saturated *E. coli* culture, resuspended and boiled in 100  $\mu$ L SDS-PAGE loading buffer, and separated on a 4-20% SDS-PAGE before being transferred to a PVDF membrane.

### Supplemental Figure 3

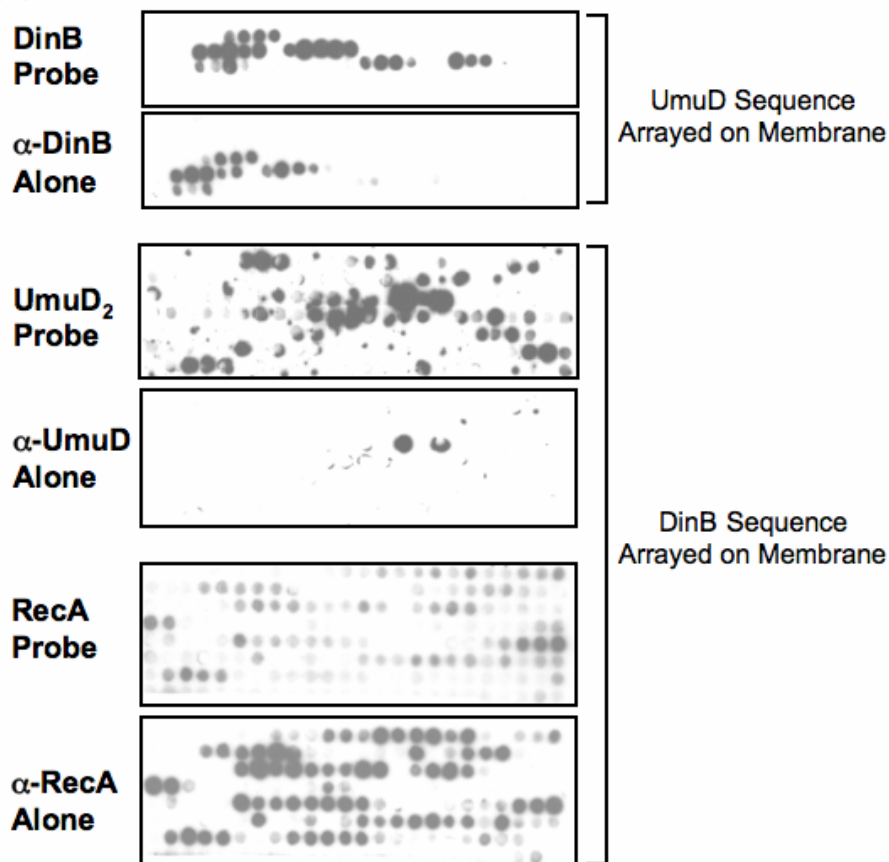

**Figure S3. Identification of the Molecular Interfaces among DinB, UmuD, and RecA by Peptide Array Mapping**

12-mer peptides scanning the primary sequence of UmuD and DinB, each offset by two residues from the previous peptide, were arrayed consecutively on cellulose filter membranes (from top left to bottom right) at the MIT Biopolymers Core Facility. Arrays were incubated with 100 nM probe (UmuD<sub>2</sub>, DinB, or RecA) overnight and blocked, washed, and developed as previously described (Niebuhr and Wehland, 1997). As a negative control, arrays were identically treated with the antibody to the probe to determine which signals arose from its spurious interaction with the array.

#### Supplemental Figure 4

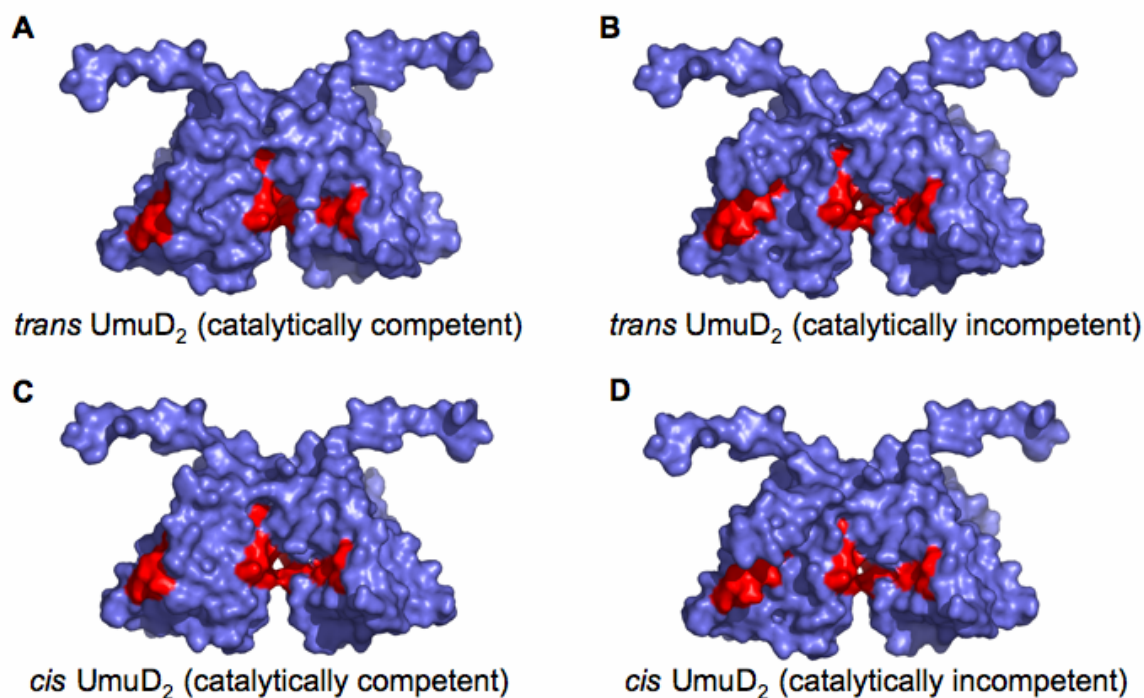

#### Figure S4. UmuD<sub>2</sub> Isoenergetic Conformers

In the *trans* conformations (**A and B**) the UmuD N-terminus crosses to the opposite monomer, while in the *cis* (**C and D**) conformations it remains on the same monomer.

**(A)** *trans* UmuD<sub>2</sub>. The structure of this conformer allows RecA-mediated autocleavage, i.e. catalytically competent.

**(B)** *trans* UmuD<sub>2</sub>. The structure of this conformer would not allow efficient RecA-mediated autocleavage.

**(C and D)** Structures of *cis* UmuD<sub>2</sub> isoenergetic conformers that would either allow RecA-mediated autocleavage (shown in **C**) or do would not (shown in **D**).

### Supplemental Figure 5

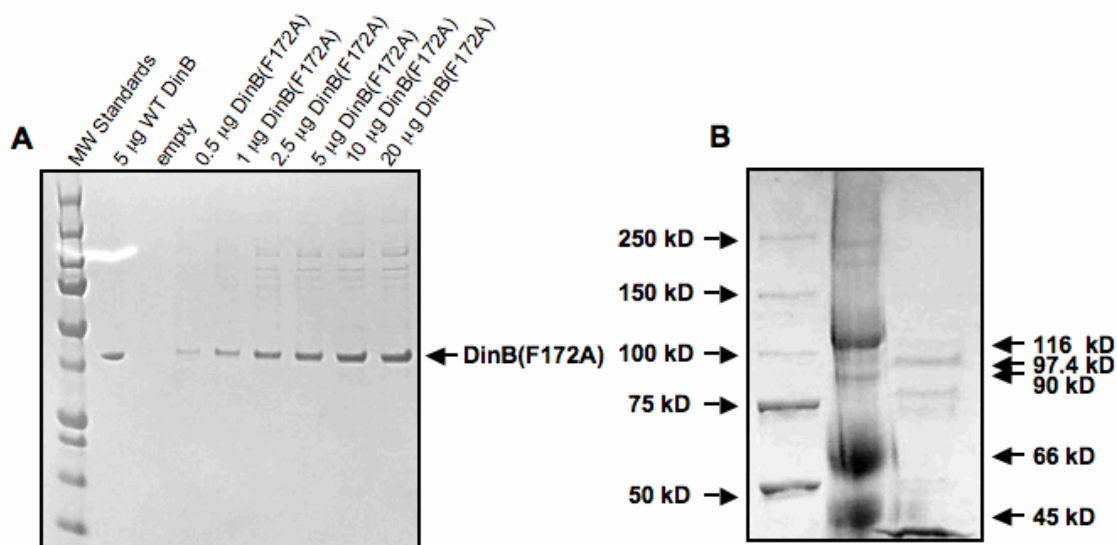

#### Figure S5. SDS-PAGE of DinB(F172A) Purification

**(A)** 4-20% SDS-PAGE of purified recombinant DinB(F172A). Precision plus molecular weight standards (BioRad) are shown in the first lane. 5 µg of a wild type DinB protein standard are shown in the second lane and increasing amounts of purified DinB(F172A) are shown in the amounts indicated.

**(B)** 4-12% SDS-PAGE of purified recombinant DinB(F172A). Lane 1 contains Precision plus molecular weight standards (BioRad). Lane 2 contains BioRad high range molecular weight standards and Pfu Turbo (90 kD; molecular weights indicated to the right of the gel). Lane 3 contains 10 µg of DinB(F172A). Neither of the high molecular weight contaminants in the

DinB(F172A) purification correspond to the size of DNA polymerase I (102.9 kD) or DNA polymerase II (89.9 kD).

### Supplemental Figure 6

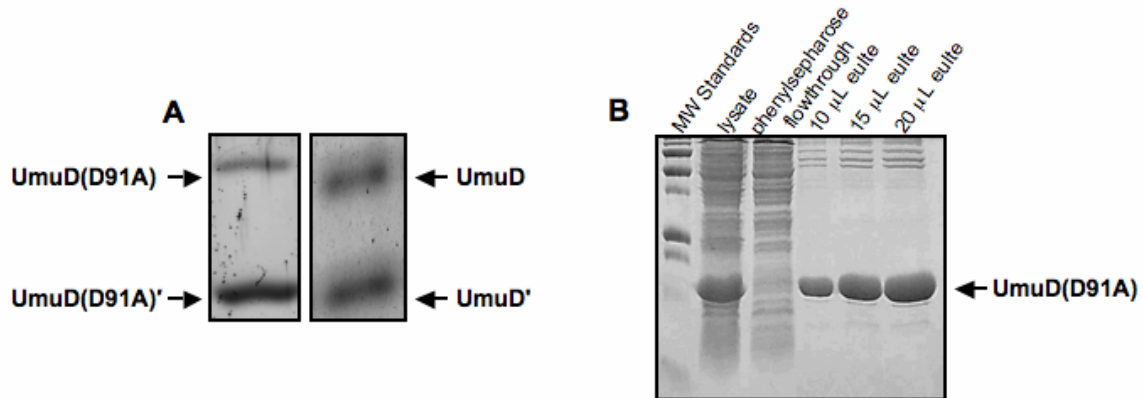

### Figure S6. The UmuD(D91A) Protein Behaves as Wild-Type UmuD for RecA-Mediated Cleavage and Purification

(A) RecA-mediated autocleavage of UmuD(D91A) and UmuD after 15 minutes. Reaction conditions are as described in (Beuning et al., 2006b).

(B) 4-20% SDS-PAGE of different stages of purification of the UmuD(D91A) variant protein. Indicated amounts of the purified protein were also run on the gel.

### Supplemental Figure 7

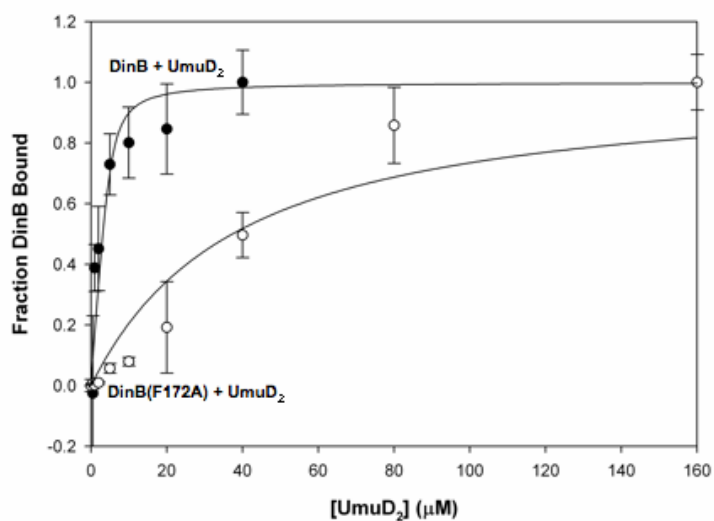

**Figure S7. Fluorescence Spectroscopy Data for the Interactions between UmuD<sub>2</sub> and DinB**

Fraction DinB bound was determined as described in (Beuning et al., 2006b) and is plotted against increasing concentrations of UmuD<sub>2</sub>. Closed circles represent the interaction of UmuD<sub>2</sub> with wild type DinB and open circles represent the interaction with the DinB(F172A) variant. Error bars represent one standard deviation determined from three independent experiments.



### Supplemental Figure 8

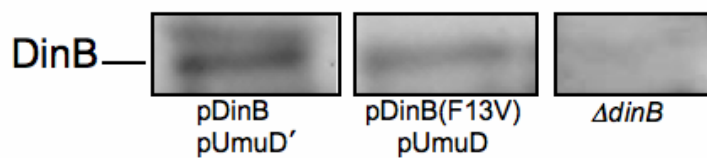

#### Figure S8. DinB and the Variant DinB(F13V) Are Present at Similar Levels in Whole-Cell Lysates

Bacterial cultures with plasmid-borne copies of wild type *dinB* and of *dinB(F13V)* were prepared by mixing 2 ml of pelleted exponential phase cells with SDS-PAGE loading buffer and boiling for 10 min. Samples were run on an 8-20% SDS-PAGE and transferred to a PVDF membrane. An antibody to DinB was used to detect both DinB and DinB(F13V).

### Supplemental Figure 9

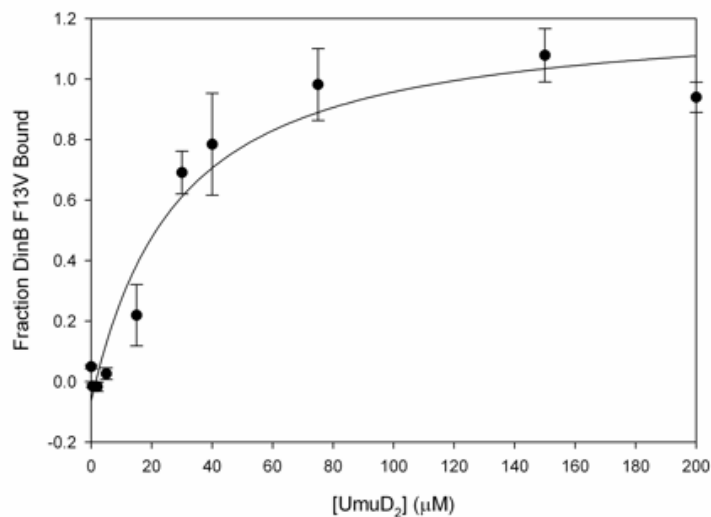

**Figure S9. Fluorescence Spectroscopy Data for Interactions between UmuD<sub>2</sub> and DinB(F13V)**

Fraction DinB bound was determined as described in experimental procedures and is plotted against increasing concentrations of UmuD<sub>2</sub>. Closed circles represent the interaction of UmuD<sub>2</sub> with DinB(F13V). Error bars represent one standard deviation determined from three independent experiments.

**Supplemental Figure 10**

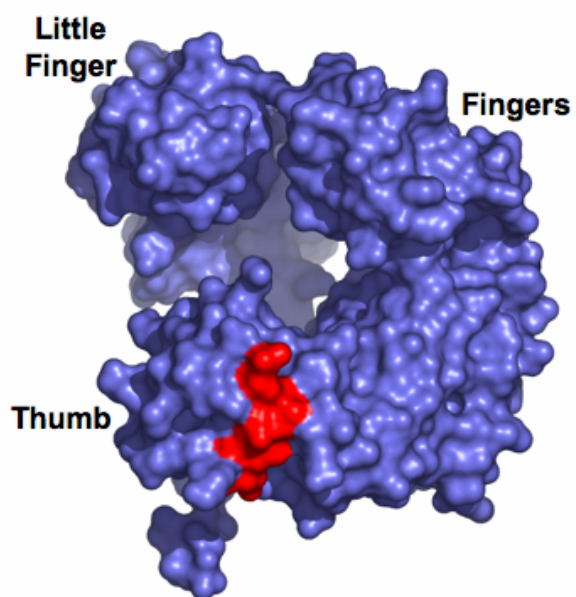

**Figure S10. Putative RecA Interaction Site on DinB**

DinB model on which RecA interacting residues (colored in red) are mapped based on peptide array analysis.

**Table S1. Strains and Plasmids Used in This Study**

| <b>Strains</b>          | <b>Genotype</b>                                                                                                                                                               | <b>Reference</b>                                          |
|-------------------------|-------------------------------------------------------------------------------------------------------------------------------------------------------------------------------|-----------------------------------------------------------|
| <i>Escherichia coli</i> |                                                                                                                                                                               |                                                           |
| BL21 (DE3)              | <i>E. coli</i> B. Standard strain used for protein overproduction                                                                                                             | GCW lab stock                                             |
| AB1157                  | <i>thr-1 araC-14 leuB-6(Am) Δ(gpt-proA)62 lacY1 tsx-33 qsr'-0 glnV44(AS) galK2(Oc) LAM Rac-0 hisG4(Oc) rfbC1 mgl-51 rpoS396(Am) rpsL31 kdgK51 xylA5 mtl-1 argE3(Oc) thi-1</i> | GCW lab stock                                             |
| P90C                    | $\Delta(lac-pro)_{XII}$ <i>ara gal</i>                                                                                                                                        | Cairns and Foster (1991)                                  |
| VG187                   | As P90C but with <i>recA</i> gene deletion                                                                                                                                    | This work                                                 |
| VG347                   | As P90C but with a precise deletion in <i>dinB</i>                                                                                                                            | This work and Jarosz et al. (2006)                        |
| P90C $\Delta umuD$      | As P90C but with a precise deletion of <i>umuD</i>                                                                                                                            | This work; $\Delta umuD::kan$ allele from Keio collection |
| FC40                    | As P90C but bearing a variant of the F'128 episome with the Lac- <i>LacI33</i> allele revertible to Lac+                                                                      | Cairns and Foster (1991)                                  |
| <b>Plasmids</b>         |                                                                                                                                                                               |                                                           |
| CC108                   | A derivative of the F'128 episome with a Lac-revertible allele                                                                                                                | Kim et al. (1997)                                         |
| pWSK29                  | pSC101-like replicon with multiple cloning site from pBluescriptSK <sup>+</sup> II. Amp <sup>R</sup>                                                                          | Jarosz et al (2006)                                       |
| pYG782                  | <i>dinB</i> gene cloned in the pWSK30 plasmid (Amp <sup>R</sup> ) which is the same as pWSK29 but MCS cloned in opposite orientation under lac promoter                       | Kim et al. (1997)                                         |
| pYG768                  | Same as pYG782 but the <i>dinB</i> gene is cloned under its own promoter                                                                                                      | Kim et al. (1997)                                         |
| pYG768-F172A            | Same as pYG768 but the <i>dinB</i> gene encodes the F172A mutation.                                                                                                           | This work                                                 |
| pYG782-F13V             | <i>dinB</i> gene encoding the F13V mutation cloned in pWSK30 (Amp <sup>R</sup> ) under lac promoter                                                                           | Jarosz et al. (2006).<br>This work                        |
| pYG782-F172A            | <i>dinB</i> gene encoding the F172A mutation cloned in pWSK30 (Amp <sup>R</sup> ) under lac promoter                                                                          | This work                                                 |
| pDinB003                | <i>dinB</i> gene encoding the D103N mutation cloned in pWSK30 (Amp <sup>R</sup> ) under lac promoter                                                                          | Wagner et al. (1999)<br>This work                         |
| pGW60101                | pBR322 (Spec <sup>R</sup> ) vector                                                                                                                                            | This work                                                 |
| pGW6010                 | <i>umuDC</i> genes cloned in pGW60101                                                                                                                                         | GCW collection                                            |
| pGW6030                 | <i>umuD</i> gene cloned in pGW60101 plasmid under the lac promoter                                                                                                            | GCW collection                                            |

|                   |                                                                                   |                                     |
|-------------------|-----------------------------------------------------------------------------------|-------------------------------------|
| pGW6030-D91A      | <i>umuD</i> gene encoding the D91A mutation cloned in pGW60101 under lac promoter | This work                           |
| pGW6030-S60A      | <i>umuD</i> gene encoding the S60A mutation cloned in pGW60101 under lac promoter | This work                           |
| pGW6040           | Same as pGW6030 but with the <i>umuD'</i> gene.                                   | GCW collection                      |
| pSG5-6030-D91A    | Same as pGW6030-D91A but in pET11T                                                | Beuning et al. (2006).<br>This work |
| pET11T-DinB-F172A | Same as pYT782-F172A but in pET11T                                                | Jarosz et al. (2006)<br>This work   |

---

**Table S2. DinB Suppresses *umuDC*-Dependent UV-Induced Mutagenesis**

**Supplemental Table 2**

| Plasmids               | -UV                          | + UV                         | Fold change   | Fold increase |
|------------------------|------------------------------|------------------------------|---------------|---------------|
| pWSK29 + pGW60101      | $4.0 \pm 1.8 \times 10^{-8}$ | $2.4 \pm 1.1 \times 10^{-7}$ | $6 \pm 3.1$   |               |
| pWSK29 + pUmuDC        | $1.2 \pm 0.6 \times 10^{-7}$ | $1.7 \pm 0.6 \times 10^{-5}$ | $142 \pm 85$  | $24 \pm 18.7$ |
| pDinB + pGW60101       | $3.9 \pm 2.1 \times 10^{-8}$ | $1.3 \pm 0.4 \times 10^{-8}$ | $33 \pm 19$   |               |
| pDinB + pUmuDC         | $5.8 \pm 1.9 \times 10^{-7}$ | $1.2 \pm 0.2 \times 10^{-5}$ | $21 \pm 7.2$  | $0.6 \pm 0.4$ |
| pDinB-F172A + pGW60101 | $5.7 \pm 3.1 \times 10^{-8}$ | $1.3 \pm 0.7 \times 10^{-7}$ | $2.0 \pm 1.0$ |               |
| pDinB-F172A + pUmuDC   | $5.0 \pm 2.8 \times 10^{-8}$ | $1.1 \pm 0.1 \times 10^{-5}$ | $220 \pm 130$ | $110 \pm 86$  |

Expression of DinB under its native promoter from a low copy number plasmid suppresses *umuDC* dependent mutagenesis induced by ultraviolet light. Plasmids were maintained with ampicillin [pWSK29 (empty vector); pYG768 (pDinB)] and spectinomycin [pGW60101 (empty vector); pGW6010 (pumuDC)]. Note that pDinB in combination with pGW60101 promotes a

modest increase in the UV-induced mutation frequency, a hitherto unreported property of DinB. Mutation frequency was determined in *E. coli* strain AB1157 by reversion from *argE3* to *arg*<sup>+</sup> as described in (Beuning *et al.*, 2006b) in the presence (30 J/m<sup>2</sup>) and absence of UV-irradiation. Error values represent standard deviations determined from 7 independent experiments.
